# Supplementary material for: Response of organic carbon mineralization and bacterial communities to soft rock additions in sandy soils
Source: PeerJ. 2020 Apr 13;8:e8948. doi: 10.7717/peerj.8948 (PMC7161572; doi:10.7717/peerj.8948)
Supplement: Figure S1 — CK: the volume ratio of soft rock to sand is 0:1; C1: the volume ratio of soft rock to sand is 1:5; C2: the volume ratio of soft rock to sand is 1:2; C3: the volume ratio of soft rock to sand is 1:1. [file peerj-08-8948-s001.xlsx]

## Sheet: Sheet1
SOC Mineralization rate (mg/kg·d)
Treatment	Number	1d	2d	3d	4d	5d	8d	11d	14d	18d	22d	26d	30d	40d	50d	60d
CK	PS21-1	23.4667	35.9333	44.286	31.218	4.356	8.228	4.114	3.388	2.541	3.8115	1.97633	2.33567	2.51533	4.81507	0.359333
	PS21-2	33	41.0667	55.176	2.904	71.148	7.39267	7.26	6.292	1.452	1.9965	2.695	5.03067	5.03067	3.234	0.718667
	PS21-3	27.8667	27.8667	49.368	16.698	37.752	4.356	5.566	4.84	6.534	5.082	5.39	2.87467	3.4496	4.02453	4.0964
	Mean	28.1111	34.9556	49.61	16.94	37.752	6.66	5.64667	4.84	3.51	3.63	3.35378	3.41367	3.6652	4.02453	1.7248
C1	PS22-1	64.5333	45.4667	60.258	27.588	40.656	17.4233	24.684	23.716	13.794	9.438	12.397	7.90533	7.40227	8.12093	4.5276
	PS22-2	52.8	38.8667	39.204	39.93	7.986	2.904	6.776	12.584	11.4345	12.8865	4.312	1.617	12.8641	5.8212	5.31813
	PS22-3	58.6667	41.8	49.368	33.396	23.958	19.844	4.356	6.05	12.5235	17.061	18.5057	21.021	10.1332	6.97107	8.12093
	Mean	58.6667	42.0444	49.61	33.638	24.2	13.39	11.94	14.1167	12.585	13.1285	11.7382	10.1811	10.1332	6.97107	5.98889
C2	PS23-1	68.9333	32.2667	41.382	21.054	22.506	10.406	9.922	14.762	15.609	11.979	1.2575	13.6547	5.6056	6.10867	7.47413
	PS23-2	18.3333	33	10.164	25.41	37.752	17.666	24.7082	17.182	2.3595	8.349	13.295	8.26467	9.12707	6.2524	7.18667
	PS23-3	43.2667	33.7333	25.41	23.232	29.766	14.036	19.602	15.972	8.8935	10.164	7.3675	1.97633	9.0552	8.26467	3.73707
	Mean	43.5111	33	25.65	23.232	30.008	14.0367	18.0767	15.9733	8.955	10.164	7.30667	7.96522	7.92929	6.87524	6.13262
C3	PS24-1	63.8	40.3333	88.572	31.218	49.368	41.866	29.524	25.168	18.6945	10.527	17.787	16.709	6.75547	4.38387	9.55827
	PS24-2	47.6667	71.8667	43.56	48.642	63.16	34.606	19.36	25.652	20.691	30.855	15.2717	16.5293	14.8764	15.8107	2.01227
	PS24-3	33	55.7333	66.066	39.93	55.9	38.236	24.442	30.976	19.602	20.691	6.28833	7.18667	12.2173	2.87467	9.34267
	Mean	48.1556	55.9778	66.07	39.93	56.1427	38.2367	24.44	27.2667	19.6625	20.691	13.1157	13.475	11.2831	7.68973	6.97107
