# Supplementary material for: Response of organic carbon mineralization and bacterial communities to soft rock additions in sandy soils
Source: PeerJ. 2020 Apr 13;8:e8948. doi: 10.7717/peerj.8948 (PMC7161572; doi:10.7717/peerj.8948)
Supplement: Figure S2 — CK: the volume ratio of soft rock to sand is 0:1; C1: the volume ratio of soft rock to sand is 1:5; C2: the volume ratio of soft rock to sand is 1:2; C3: the volume ratio of soft rock to sand is 1:1. [file peerj-08-8948-s002.xlsx]

## Sheet: Sheet1
SOC Mineralization (mg/kg)
Treatment	Number	1d	2d	3d	4d	5d	8d	11d	14d	18d	22d	26d	30d	40d	50d	60d
CK	PS21-1	23.4667	35.9333	44.286	31.218	4.356	24.684	12.342	10.164	10.164	15.246	7.90533	9.34267	25.1533	48.1507	3.59333
	PS21-2	33	41.0667	55.176	2.904	71.148	22.178	21.78	18.876	5.808	7.986	10.78	20.1227	50.3067	32.34	7.18667
	PS21-3	27.8667	27.8667	49.368	16.698	37.752	13.068	16.698	14.52	26.136	20.328	21.56	11.4987	34.496	40.2453	40.964
	Mean	28.1111	34.9556	49.61	16.94	37.752	19.98	16.94	14.52	14.04	14.52	13.4151	13.6547	36.652	40.2453	17.248
C1	PS22-1	64.5333	45.4667	60.258	27.588	40.656	52.27	74.052	71.148	55.176	37.752	49.588	31.6213	74.0227	81.2093	45.276
	PS22-2	52.8	38.8667	39.204	39.93	7.986	8.712	20.328	37.752	45.738	51.546	17.248	6.468	128.641	58.212	53.1813
	PS22-3	58.6667	41.8	49.368	33.396	23.958	59.532	13.068	18.15	50.094	68.244	74.0227	84.084	101.332	69.7107	81.2093
	Mean	58.6667	42.0444	49.61	33.638	24.2	40.17	35.82	42.35	50.34	52.514	46.9529	40.7244	101.332	69.7107	59.8889
C2	PS23-1	68.9333	32.2667	41.382	21.054	22.506	31.218	29.766	44.286	62.436	47.916	5.03	54.6187	56.056	61.0867	74.7413
	PS23-2	18.3333	33	10.164	25.41	37.752	52.998	74.1246	51.546	9.438	33.396	53.18	33.0587	91.2707	62.524	71.8667
	PS23-3	43.2667	33.7333	25.41	23.232	29.766	42.108	58.806	47.916	35.574	40.656	29.47	7.90533	90.552	82.6467	37.3707
	Mean	43.5111	33	25.65	23.232	30.008	42.11	54.23	47.92	35.82	40.656	29.2267	31.8609	79.2929	68.7524	61.3262
C3	PS24-1	63.8	40.3333	88.572	31.218	49.368	125.598	88.572	75.504	74.778	42.108	71.148	66.836	67.5547	43.8387	95.5827
	PS24-2	47.6667	71.8667	43.56	48.642	63.16	103.818	58.08	76.956	82.764	123.42	61.0867	66.1173	148.764	158.107	20.1227
	PS24-3	33	55.7333	66.066	39.93	55.9	114.708	73.326	92.928	78.408	82.764	25.1533	28.7467	122.173	28.7467	93.4267
	Mean	48.1556	55.9778	66.07	39.93	56.1427	114.71	73.32	81.8	78.65	82.764	52.4627	53.9	112.831	76.8973	69.7107
