# Supplementary material for: Response of organic carbon mineralization and bacterial communities to soft rock additions in sandy soils
Source: PeerJ. 2020 Apr 13;8:e8948. doi: 10.7717/peerj.8948 (PMC7161572; doi:10.7717/peerj.8948)
Supplement: Figure S3 — CK: the volume ratio of soft rock to sand is 0:1; C1: the volume ratio of soft rock to sand is 1:5; C2: the volume ratio of soft rock to sand is 1:2; C3: the volume ratio of soft rock to sand is 1:1. [file peerj-08-8948-s003.xlsx]

## Sheet: Sheet1
		Cumulative mineralization mg/kg	SOC g/kg	Cumulative mineralization rate%
	CK	368.584	2.0151	18.2911
	C1	718.406	4.2365	16.9575
	C2	633.196	3.561	17.7814
	C3	1046.28	4.4085	23.7332
