# Supplementary material for: Response of organic carbon mineralization and bacterial communities to soft rock additions in sandy soils
Source: PeerJ. 2020 Apr 13;8:e8948. doi: 10.7717/peerj.8948 (PMC7161572; doi:10.7717/peerj.8948)
Supplement: Figure S4 — CK: the volume ratio of soft rock to sand is 0:1; C1: the volume ratio of soft rock to sand is 1:5; C2: the volume ratio of soft rock to sand is 1:2; C3: the volume ratio of soft rock to sand is 1:1. [file peerj-08-8948-s004.xlsx]

## Sheet: Sheet1
			Repeat 1	Repeat 2	Repeat 3	Mean	Standard deviation	0.05
		CK	1.7	1.74	1.83	1.7567	0.0666	c
		C1	2.77	2.78	2.95	2.8333	0.1012	a
		C2	2.28	2.27	2.34	2.2967	0.0379	b
		C3	2.28	2.28	2.38	2.3133	0.0577	b
