# Supplementary material for: Response of organic carbon mineralization and bacterial communities to soft rock additions in sandy soils
Source: PeerJ. 2020 Apr 13;8:e8948. doi: 10.7717/peerj.8948 (PMC7161572; doi:10.7717/peerj.8948)
Supplement: Figure S5 — CK: the volume ratio of soft rock to sand is 0:1; C1: the volume ratio of soft rock to sand is 1:5; C2: the volume ratio of soft rock to sand is 1:2; C3: the volume ratio of soft rock to sand is 1:1. [file peerj-08-8948-s005.xls]

## Sheet: Sheet1
	Microcoleus	Pseudarthrobacter	norank_o__JG30-KF-CM45	norank_c__Acidobacteria	Microvirga	norank_o__Acidimicrobiales	Nocardioides	norank_p__Saccharibacteria	Sphingomonas	norank_f__Anaerolineaceae
CK-1	7.26e-05	0.0827619	0.073292	0.030623	0.0268858	0.0121549	0.0221327	0.0290265	0.0287725	0.0120823
CK-2	0.0662054	0.162238	0.0635481	0.0237332	0.052552	0.0205718	0.0348209	0.0300559	0.0285898	0.0235499
CK-3	0.043099	0.13246	0.07838	0.0371381	0.0496789	0.0263234	0.0384368	0.0395012	0.0386411	0.0277761
C1-1	0.0013293	0.105904	0.045087	0.0530261	0.022525	0.0289502	0.0299472	0.0327536	0.0323105	0.0358923
C1-2	0.0002709	0.145418	0.0528668	0.0468172	0.0190068	0.0297517	0.0559368	0.0368849	0.0316027	0.0176524
C1-3	0.0008501	0.125711	0.0490269	0.0499716	0.0208159	0.0294009	0.042992	0.0348692	0.0320066	0.0268223
C2-1	0.0006056	0.136872	0.0445315	0.0553616	0.0276095	0.0280371	0.0468115	0.0434271	0.0356252	0.034414
C2-2	0.0057257	0.0491841	0.0515316	0.052276	0.0283424	0.0408245	0.0743773	0.0226739	0.0341827	0.0243916
C2-3	0.00346565	0.0933281	0.0483316	0.0541188	0.028276	0.0347308	0.0608944	0.0333505	0.035204	0.0297028
C3-1	0.0576157	0.106017	0.0394543	0.0589577	0.0257213	0.0245135	0.0462984	0.0466562	0.0355178	0.0938045
C3-2	0.000216	0.0547229	0.0822788	0.123613	0.0104954	0.0242301	0.0273399	0.0159375	0.0240142	0.0396493
C3-3	0.0297159	0.0811697	0.0616666	0.0920851	0.0189084	0.0251718	0.0376192	0.0320969	0.030566	0.0675269
	Massilia	Bacillus	Lysobacter	Mycobacterium	norank_f__Gemmatimonadaceae	RB41	Enterococcus	norank_c__KD4-96	norank_c__Gitt-GS-136	norank_f__AKIW781
CK-1	0.011792	0.0841044	0.0650194	0.0054788	0.0141141	0.0102318	0.0528283	0.0272124	0.017815	0.008708
CK-2	0.0371117	0.0116833	0.0131953	0.0049482	0.0132411	0.0059562	0.0169981	0.0140658	0.0147072	0.0077431
CK-3	0.0344119	0.0578539	0.0490674	0.0151735	0.0236376	0.018054	0.0448732	0.0305991	0.0262211	0.0181856
C1-1	0.0544293	0.0138473	0.0043573	0.0276947	0.0190909	0.0148813	0.0183154	0.0217865	0.0157306	0.0163214
C1-2	0.0181941	0.0194582	0.0186005	0.004921	0.0327765	0.0213995	0.0179233	0.0206772	0.0194131	0.0036117
C1-3	0.0363617	0.0167027	0.0115289	0.0163578	0.0259837	0.0181904	0.0181693	0.0212818	0.0176218	0.0100165
C2-1	0.0531172	0.0058425	0.0064125	0.0046669	0.0139651	0.0091201	0.0143213	0.0278233	0.0230851	0.0258639
C2-2	0.0269682	0.0248497	0.0065846	0.006012	0.0431721	0.0280561	0.0160321	0.0184369	0.0125394	0.0050386
C2-3	0.0403427	0.0156461	0.00679855	0.00563945	0.0288686	0.0188881	0.0154767	0.0234301	0.0181123	0.0157513
C3-1	0.0497428	0.0026392	0.0048759	0.0036681	0.0116752	0.00586	0.0087676	0.0294789	0.0203534	0.0169984
C3-2	0.00203	0.0136483	0.0114456	0.0063923	0.0450913	0.0505334	0.0343368	0.0453937	0.0361508	0.0039304
C3-3	0.0266864	0.00894375	0.00896075	0.0058302	0.0291833	0.0289967	0.0223522	0.0382363	0.0290521	0.0112644
	Pseudomonas	Lysinimonas	unclassified_f__Phyllobacteriaceae	unclassified_o__Sphingomonadales	Aeromicrobium	Blastococcus	Streptomyces	Nitrobacter	norank_c__Actinobacteria	Pedobacter
CK-1	0.0427053	0.0391132	0.0363557	0.0331628	0.0156743	0.0116469	0.0133885	0.0181779	0.0060956	0.0093248
CK-2	0.0119124	0.0224045	0.0143865	0.0094841	0.0204343	0.0238706	0.0141116	0.0084303	0.0075598	0.0183726
CK-3	0.0372689	0.0407189	0.0353311	0.0312835	0.0280143	0.0277188	0.0237101	0.0232641	0.0167877	0.0238087
C1-1	0.0269562	0.0221188	0.0238174	0.0118903	0.0176138	0.010007	0.0133304	0.0153982	0.013515	0.0134781
C1-2	0.0133634	0.0224831	0.0109707	0.0130926	0.0186907	0.0217607	0.0161174	0.0104289	0.0125056	0.0162528
C1-3	0.0202098	0.0223509	0.017444	0.0125414	0.0182022	0.0159338	0.0147739	0.0129635	0.0130603	0.0149155
C2-1	0.0255077	0.0212683	0.0131813	0.0170289	0.0188814	0.016637	0.0175276	0.0140007	0.014357	0.0160314
C2-2	0.0104781	0.005783	0.015803	0.0100773	0.0206127	0.0302891	0.0277126	0.0119668	0.0127111	0.0091039
C2-3	0.0182929	0.0138257	0.0147922	0.0138531	0.0200471	0.0237631	0.0229201	0.0132838	0.0138341	0.0128677
C3-1	0.0147171	0.0152986	0.0104675	0.0099754	0.0170432	0.0231268	0.0093044	0.0116305	0.0125252	0.0118989
C3-2	0.0066082	0.0060467	0.0089405	0.0091133	0.0132164	0.0202566	0.0212068	0.0135188	0.0137347	0.0031097
C3-3	0.0114626	0.0114726	0.010504	0.0103444	0.0159298	0.0224917	0.0160556	0.0133747	0.01393	0.0083043
	norank_f__Longimicrobiaceae	Devosia	Arthrobacter	norank_c__Cyanobacteria	Mesorhizobium	Nitrosospira	Iamia	norank_o__Subgroup_7	Bryobacter	Agromyces
CK-1	0.0226044	0.0134611	0.0038823	0.0164726	0.0108849	0.0136062	0.0150575	0.0018504	0.0044628	0.0036646
CK-2	0.0151654	0.0129204	0.02103	0.0104463	0.0128287	0.009759	0.0067809	0.0024741	0.0083845	0.0048108
CK-3	0.0288449	0.0231508	0.0224162	0.0234195	0.0218168	0.0216426	0.0208792	0.0121222	0.0163836	0.0141977
C1-1	0.0115579	0.0167276	0.0124072	0.0051697	0.0096008	0.0097485	0.0079391	0.0172076	0.0089362	0.0126657
C1-2	0.0088488	0.0088036	0.0329571	0.0057788	0.0088939	0.0105192	0.009526	0.0056433	0.0069977	0.0092099
C1-3	0.0102533	0.0128156	0.0227321	0.00552425	0.00929735	0.0101838	0.00878255	0.0114754	0.00801695	0.0109878
C2-1	0.015497	0.0198432	0.0108301	0.0074457	0.0092982	0.0127182	0.0067332	0.0060919	0.0062344	0.0077307
C2-2	0.011795	0.0089894	0.0076725	0.0029201	0.0056112	0.0077297	0.0089322	0.0092184	0.0110507	0.0101346
C2-3	0.013946	0.0147163	0.0095513	0.0054829	0.0077547	0.010524	0.0081327	0.00795515	0.00894255	0.00923265
C3-1	0.0140013	0.0139566	0.0089465	0.0094386	0.0052337	0.0054127	0.0051443	0.0087676	0.0082756	0.0057258
C3-2	0.006565	0.0061763	0.0069537	0.0031961	0.0050965	0.0094156	0.0091133	0.0086814	0.0084222	0.0060467
C3-3	0.0110831	0.0108664	0.0087501	0.00711735	0.0059651	0.00821415	0.0079288	0.0095245	0.0091489	0.00668625
	unclassified_f__Micromonosporaceae	Skermanella	norank_o__AKYG1722	norank_c__TK10	Solirubrobacter	norank_f__Nitrosomonadaceae	Roseiflexus	Gaiella	norank_f__Cytophagaceae	Nitrospira
CK-1	0.0079823	0.0069664	0.0076557	0.0051159	0.0056965	0.0033381	0.0054425	0.0022858	0.0044628	0.004354
CK-2	0.0136534	0.0233208	0.0120957	0.0100797	0.0144781	0.0044901	0.0081554	0.0035279	0.004765	0.0043526
CK-3	0.0207779	0.0251036	0.0198357	0.0175578	0.0200473	0.0138741	0.016759	0.0128669	0.0145739	0.0143133
C1-1	0.0230051	0.0064252	0.0074222	0.0139581	0.0142535	0.0172815	0.0146967	0.0073483	0.0104132	0.0109302
C1-2	0.0091196	0.0122799	0.0116479	0.0149436	0.0159819	0.0153047	0.0080361	0.0103386	0.0114673	0.0148533
C1-3	0.0161123	0.00940255	0.00958505	0.0145008	0.0151677	0.0163431	0.0114164	0.00889345	0.0109902	0.0129418
C2-1	0.005415	0.0064482	0.0072319	0.0105094	0.0101888	0.0104738	0.0094407	0.0069469	0.0128607	0.0061275
C2-2	0.0171772	0.0206127	0.0100773	0.0236473	0.0250215	0.0222159	0.01712	0.0147151	0.019582	0.0200401
C2-3	0.0115961	0.0138305	0.0089546	0.0173784	0.0179052	0.0166449	0.0135804	0.011131	0.0165214	0.0133838
C3-1	0.0069783	0.008365	0.0084098	0.0100649	0.0089018	0.0132856	0.0111384	0.0069336	0.012391	0.0040259
C3-2	0.0108841	0.0103226	0.0141234	0.0327819	0.0171468	0.0201702	0.0207317	0.0120503	0.0108841	0.0140371
C3-3	0.0097312	0.0101438	0.0120666	0.0222234	0.0138243	0.0175279	0.0167351	0.0102919	0.0124376	0.0098315
