# Supplementary material for: Response of organic carbon mineralization and bacterial communities to soft rock additions in sandy soils
Source: PeerJ. 2020 Apr 13;8:e8948. doi: 10.7717/peerj.8948 (PMC7161572; doi:10.7717/peerj.8948)
Supplement: Figure S6 — SOC for amount of soil organic carbon, Ct for amount of accumulation mineralizable of SOC, C0 for amount of potential mineralizable of SOC, Cr for amount of cumulative mineralization rate of SOC, k for constant of mineralization rate of SOC, T1∕2 for half turnover period, C0/SOC for ratio of potential mineralizable organic carbon to total organic carbon in soil. ** and * mean significant correlation at the 0.01 and 0.05 levels respectively. [file peerj-08-8948-s006.xlsx]

## Sheet: Sheet1
#SampleID	SOC	Ct	C0	Cr	k	T1/2	C0/SOC
CK	2.02	0.37	0.4	18.29	0.0959	7.23	18.85
C1	4.23	0.72	0.79	16.96	0.0344	20.14	18.75
C2	3.56	0.63	0.68	17.78	0.0362	19.13	19.11
C3	4.41	1.05	1.09	23.73	0.0456	15.22	24.67
Phulum	Treatments
	CK	C1	C2	C3
Actinobacteria	31.33	35.46	30.73	22.52
Proteobacteria	28.38	25.98	31.4	22.33
Chloroflexi	11.84	12.14	12.17	22.04
Acidobacteria	3.98	6.59	7.55	15.19
Bacteroidetes	6.43	4.77	4.36	2.52
Firmicutes	4.05	4.93	4.32	4.16
Gemmatimonadetes	2.68	3.76	4.34	4.82
Cyanobacteria	6.05	0.68	0.47	0.77
Saccharibacteria	1.88	2.45	1.36	1.05
Verrucomicrobia	1.25	0.81	0.55	1.28
Nitrospirae	0.27	0.98	1.2	0.92
Planctomycetes	0.72	0.62	0.54	1.17
