# Supplementary material for: Response of organic carbon mineralization and bacterial communities to soft rock additions in sandy soils
Source: PeerJ. 2020 Apr 13;8:e8948. doi: 10.7717/peerj.8948 (PMC7161572; doi:10.7717/peerj.8948)
Supplement: Figure S7 — Green arrows indicate species, and red arrows indicate quantitative environmental factors. [file peerj-08-8948-s007.xls]

## Sheet: Sheet1
Actinobacteria	Treatments	Repeat1	Repeat2	Repeat3	Mean	standard deviation	0.05		Proteobacteria	Treatments	Repeat1	Repeat2	Repeat3	Mean	standard deviation	0.05
	CK	28.09	34.28	31.62	31.33	3.1052	a			CK	30.98	26.49	27.68	28.3833	2.3262	ab
	C1	38.23	35.19	32.96	35.46	2.6454	a			C1	26.94	25.74	25.26	25.98	0.8653	ab
	C2	31.93	30.94	29.32	30.73	1.3176	a			C2	28.02	36.12	30.05	31.3967	4.2146	a
	C3	23.62	20.59	23.35	22.52	1.6769	b			C3	21.4	22.23	23.35	22.3267	0.9786	b
Chloroflexi	Treatments	Repeat1	Repeat2	Repeat3	Mean	standard deviation	0.05		Acidobacteria	Treatments	Repeat1	Repeat2	Repeat3	Mean	standard deviation	0.05
	CK	11.1	12.62	11.8	11.84	0.7608	b			CK	3.68	3.42	4.84	3.98	0.756	c
	C1	18.19	11.83	19.51	16.51	4.1064	ab			C1	6.75	6.01	7.01	6.59	0.5188	b
	C2	13.27	10.8	12.44	12.17	1.2569	b			C2	7.88	7.36	7.41	7.55	0.2869	b
	C3	21.18	21.5	23.44	22.04	1.2229	a			C3	16.2	14.04	15.33	15.19	1.0868	a
Bacteroidetes	Treatments	Repeat1	Repeat2	Repeat3	Mean	standard deviation	0.05		Firmicutes	Treatments	Repeat1	Repeat2	Repeat3	Mean	standard deviation	0.05
	CK	6.01	6.86	6.42	6.43	0.4251	a			CK	4.51	3.63	4.01	4.05	0.4414	a
	C1	5.13	4.92	4.26	4.77	0.454	b			C1	4.55	5.78	4.46	4.93	0.7375	a
	C2	4.25	4.47	4.36	4.36	0.11	b			C2	4.23	4.19	4.54	4.32	0.1916	a
	C3	2.41	2.64	2.51	2.52	0.1153	c			C3	4.02	4.61	3.85	4.16	0.3989	a
Gemmatimonadetes	Treatments	Repeat1	Repeat2	Repeat3	Mean	standard deviation	0.05		Cyanobacteria	Treatments	Repeat1	Repeat2	Repeat3	Mean	standard deviation	0.05
	CK	2.23	2.58	3.23	2.68	0.5074	c			CK	6.02	6.22	5.91	6.05	0.1572	a
	C1	3.71	3.76	3.81	3.76	0.05	b			C1	0.72	0.58	0.74	0.68	0.0872	bc
	C2	4.72	4.02	4.28	4.34	0.3538	ab			C2	0.41	0.54	0.46	0.47	0.0656	c
	C3	4.35	5.28	4.83	4.82	0.4651	a			C3	0.89	0.68	0.74	0.77	0.1082	b
Saccharibacteria	Treatments	Repeat1	Repeat2	Repeat3	Mean	standard deviation	0.05		Verrucomicrobia	Treatments	Repeat1	Repeat2	Repeat3	Mean	standard deviation	0.05
	CK	1.78	2.05	1.81	1.88	0.148	ab			CK	1.31	1.2	1.24	1.25	0.0557	a
	C1	1.9	2.87	2.58	2.45	0.4979	a			C1	0.76	0.72	0.95	0.81	0.1229	b
	C2	1.27	1.24	1.57	1.36	0.1825	bc			C2	0.5	0.63	0.52	0.55	0.07	b
	C3	1.28	1.02	0.85	1.05	0.2166	c			C3	1.13	1.31	1.4	1.28	0.1375	a
Nitrospirae	Treatments	Repeat1	Repeat2	Repeat3	Mean	standard deviation	0.05		Planctomycetes	Treatments	Repeat1	Repeat2	Repeat3	Mean	standard deviation	0.05
	CK	0.26	0.24	0.31	0.27	0.0361	c			CK	0.77	0.6	0.79	0.72	0.1044	b
	C1	0.95	1.01	0.98	0.98	0.03	ab			C1	0.65	0.61	0.6	0.62	0.0265	b
	C2	1.19	1.08	1.42	1.23	0.1735	a			C2	0.61	0.45	0.56	0.54	0.0819	b
	C3	0.84	1.03	0.89	0.92	0.0985	b			C3	1.17	1.11	1.23	1.17	0.06	a
others	Treatments	Repeat1	Repeat2	Repeat3	Mean	standard deviation	0.05
	CK	1.23	0.86	1.33	1.14	0.2476	ab
	C1	0.74	0.86	0.83	0.81	0.0624	b
	C2	1.09	1	0.94	1.01	0.0755	ab
	C3	1.14	1.23	1.32	1.23	0.09	a
Soil temperature/℃	Treatments	Repeat 1	Repeat 2	Repeat 3	Mean	Standard deviation	0.05		SOC/g kg-1	Treatments	Repeat 1	Repeat 2	Repeat 3	Mean	Standard deviation	0.05
	CK	18.5893	18.8405	19.5595	18.9964	0.503569	d			CK	2.15318	1.85091	2.04128	2.0151	0.0882	b
	C1	20.1869	20.6274	21.5333	20.7825	0.686493	c			C1	4.763	4.9607	2.98567	4.2365	0.628	a
	C2	21.7452	21.5369	22.3417	21.8746	0.417686	b			C2	4.30579	3.33244	3.04475	3.561	0.3815	a
	C3	23.1667	23.2738	24.1226	23.521	0.523737	a			C3	4.31481	4.53024	4.38039	4.4085	0.0638	a
Bulk density g/cm3	Treatments	Repeat 1	Repeat 2	Repeat 3	Mean	Standard deviation	0.05		TN/g kg-1	Treatments	Repeat 1	Repeat 2	Repeat 3	Mean	Standard deviation	0.05
	CK				1.75	0.391535	a			CK	1.22863	1.049	0.95907	1.0789	0.1372	c
	C1				1.57667	0.255408	a			C1	1.6586	1.5666	1.3653	1.5302	0.15	b
	C2				1.5	0.521153	a			C2	1.77778	1.87715	1.70181	1.7856	0.0879	b
	C3				1.26667	0.310215	a			C3	2.16811	2.0893	2.37306	2.2102	0.1465	a
	Treatments	Repeat 1	Repeat 2	Repeat 3	Mean	Standard deviation	0.05		AP/mg kg-1	Treatments	Repeat 1	Repeat 2	Repeat 3	Mean	Standard deviation	0.05
Water content/%	CK	1.69	1.38	1.73	1.6	0.1916	c			CK	15.6787	11.4947	10.7856	12.653	2.6442	b
	C1	3.18	3.02	4.25	3.4833	0.6688	b			C1	6.28515	9.54917	4.49492	6.7764	2.5627	b
	C2	4.97	5.15	4.39	4.8367	0.3972	ab			C2	32.2335	33.3975	23.6858	29.7722	5.3031	a
	C3	6.52	4.51	6.29	5.7733	1.1001	a			C3	19.5434	13.6102	7.3839	13.5125	6.0803	b
AK/mg kg-1	Treatments	Repeat 1	Repeat 2	Repeat 3	Mean	Standard deviation	0.05		NO3--N/mg kg-1	Treatments	Repeat 1	Repeat 2	Repeat 3	Mean	Standard deviation	0.05
	CK	43.951	49.9622	58.8022	50.9051	7.4704	a			CK	25.9205	18.3718	12.7582	19.0168	6.6048	c
	C1	82.6702	77.1894	34.5806	64.8134	13.3254	a			C1	46.0285	36.3914	24.59	35.67	10.7375	bc
	C2	119.445	57.211	47.1334	74.5963	19.1652	a			C2	58.4038	61.8027	45.4279	55.2115	8.6416	b
	C3	98.0518	134.826	71.7086	101.529	11.7021	a			C3	93.8054	98.3514	73.5825	88.5798	13.1854	a
									NH4+-N/mg kg-1	Treatments	Repeat 1	Repeat 2	Repeat 3	Mean	Standard deviation	0.05
										CK	2.84279	2.90916	2.68258	2.8115	0.1165	a
										C1	3.25168	2.94211	2.76792	2.9872	0.245	a
										C2	3.49281	3.52891	3.12779	3.3832	0.2219	a
										C3	5.71934	4.01689	3.30117	4.3458	1.2422	a
