# Supplementary material for: Response of organic carbon mineralization and bacterial communities to soft rock additions in sandy soils
Source: PeerJ. 2020 Apr 13;8:e8948. doi: 10.7717/peerj.8948 (PMC7161572; doi:10.7717/peerj.8948)
Supplement: Table S1 — CK: the volume ratio of soft rock to sand is 0:1; C1: the volume ratio of soft rock to sand is 1:5; C2: the volume ratio of soft rock to sand is 1:2; C3: the volume ratio of soft rock to sand is 1:1. SOC stands for soil organic carbon; TN stands for soil total nitrogen; AP stands for available phosphorus; AK stands for available potassium; NO\documentclass[12pt]{minimal} \usepackage{amsmath} \usepackage{wasysym} \usepackage{amsfonts} \usepackage{amssymb} \usepackage{amsbsy} \usepackage{upgreek} \usepackage{mathrsfs} \setlength{\oddsidemargin}{-69pt} \begin{document} }{}${}_{3}^{-}$\end{document}3−-N stands for nitrate nitrogen; NH\documentclass[12pt]{minimal} \usepackage{amsmath} \usepackage{wasysym} \usepackage{amsfonts} \usepackage{amssymb} \usepackage{amsbsy} \usepackage{upgreek} \usepackage{mathrsfs} \setlength{\oddsidemargin}{-69pt} \begin{document} }{}${}_{4}^{+}$\end{document}4+-N stands for ammonium nitrogen; ST stands for soil temperature; BD stands for soil bulk density; WC stands for mass water content of soil. Mean ± Standard deviation, different lowercase letters in the same column indicate a significant difference at 5% level between treatments. [file peerj-08-8948-s008.xls]

## Sheet: basic soil properties
	2019.01							2019.02							2019.03							2019.04							2019.05							2019.06
Treatments	1899-12-31 08:00:00	1899-12-31 10:00:00	1899-12-31 12:00:00	1899-12-31 14:00:00	1899-12-31 16:00:00	1899-12-31 18:00:00	1899-12-31 20:00:00	1899-12-31 08:00:00	1899-12-31 10:00:00	1899-12-31 12:00:00	1899-12-31 14:00:00	1899-12-31 16:00:00	1899-12-31 18:00:00	1899-12-31 20:00:00	1899-12-31 08:00:00	1899-12-31 10:00:00	1899-12-31 12:00:00	1899-12-31 14:00:00	1899-12-31 16:00:00	1899-12-31 18:00:00	1899-12-31 20:00:00	1899-12-31 08:00:00	1899-12-31 10:00:00	1899-12-31 12:00:00	1899-12-31 14:00:00	1899-12-31 16:00:00	1899-12-31 18:00:00	1899-12-31 20:00:00	1899-12-31 08:00:00	1899-12-31 10:00:00	1899-12-31 12:00:00	1899-12-31 14:00:00	1899-12-31 16:00:00	1899-12-31 18:00:00	1899-12-31 20:00:00	1899-12-31 08:00:00	1899-12-31 10:00:00	1899-12-31 12:00:00	1899-12-31 14:00:00	1899-12-31 16:00:00	1899-12-31 18:00:00	1899-12-31 20:00:00	average
CK	0.8	2.5	6.8	9.1	5.1	1.2	1.2	4	5	9.6	11.1	10	8.5	5.8	7	16	21	25	24	22	13	13.8	17.8	19.1	20.8	20.5	20	16	20	27	25.5	31.5	29	26	18	23	29	33	31	30.5	29	26	17.0286
CK	1.8	3.5	7.8	10.1	6.1	2.2	2.2	5	6	10.6	12.1	11	9.5	6.8	8	17	22	26	25	23	14	14.8	18.8	20.1	21.8	21.5	21	17	21	28	26.5	32.5	30	27	19	24	30	34	32	31.5	30	27	18.0286
CK	2.8	4.5	8.8	11.1	7.1	3.2	3.2	6	7	11.6	13.1	12	10.5	7.8	9	18	23	27	26	24	15	15.8	19.8	21.1	22.8	22.5	22	18	22	29	27.5	33.5	31	28	20	25	31	35	33	32.5	31	28	19.0286
C1	3.8	5.5	9.8	12.1	8.1	4.2	4.2	7	8	12.6	14.1	13	11.5	8.8	10	19	24	28	27	25	16	16.8	20.8	22.1	23.8	23.5	23	19	23	30	28.5	34.5	32	29	21	26	32	36	34	33.5	32	29	20.0286
C1	4.8	6.5	10.8	13.1	9.1	5.2	5.2	8	9	13.6	15.1	14	12.5	9.8	11	20	25	29	28	26	17	17.8	21.8	23.1	24.8	24.5	24	20	24	31	29.5	35.5	33	30	22	27	33	37	35	34.5	33	30	21.0286
C1	5.8	7.5	11.8	14.1	10.1	6.2	6.2	9	10	14.6	16.1	15	13.5	10.8	12	21	26	30	29	27	18	18.8	22.8	24.1	25.8	25.5	25	21	25	32	30.5	36.5	34	31	23	28	34	38	36	35.5	34	31	22.0286
C2	6.8	8.5	12.8	15.1	11.1	7.2	7.2	10	11	15.6	17.1	16	14.5	11.8	13	22	27	31	30	28	19	19.8	23.8	25.1	26.8	26.5	26	22	26	33	31.5	37.5	35	32	24	29	35	39	37	36.5	35	32	23.0286
C2	7.8	9.5	13.8	16.1	12.1	8.2	8.2	11	12	16.6	18.1	17	15.5	12.8	14	23	28	32	31	29	20	20.8	24.8	26.1	27.8	27.5	27	23	27	34	32.5	38.5	36	33	25	30	36	40	38	37.5	36	33	24.0286
C2	8.8	10.5	14.8	17.1	13.1	9.2	9.2	12	13	17.6	19.1	18	16.5	13.8	15	24	29	33	32	30	21	21.8	25.8	27.1	28.8	28.5	28	24	28	35	33.5	39.5	37	34	26	31	37	41	39	38.5	37	34	25.0286
C3	9.8	11.5	15.8	18.1	14.1	10.2	10.2	13	14	18.6	20.1	19	17.5	14.8	16	25	30	34	33	31	22	22.8	26.8	28.1	29.8	29.5	29	25	29	36	34.5	40.5	38	35	27	32	38	42	40	39.5	38	35	26.0286
C3	10.8	12.5	16.8	19.1	15.1	11.2	11.2	14	15	19.6	21.1	20	18.5	15.8	17	26	31	35	34	32	23	23.8	27.8	29.1	30.8	30.5	30	26	30	37	35.5	41.5	39	36	28	33	39	43	41	40.5	39	36	27.0286
C3	11.8	13.5	17.8	20.1	16.1	12.2	12.2	15	16	20.6	22.1	21	19.5	16.8	18	27	32	36	35	33	24	24.8	28.8	30.1	31.8	31.5	31	27	31	38	36.5	42.5	40	37	29	34	40	44	42	41.5	40	37	28.0286
	2019.07							2019.08							2019.09							2019.10							2019.11							2019.12
Treatments	1899-12-31 08:00:00	1899-12-31 10:00:00	1899-12-31 12:00:00	1899-12-31 14:00:00	1899-12-31 16:00:00	1899-12-31 18:00:00	1899-12-31 20:00:00	1899-12-31 08:00:00	1899-12-31 10:00:00	1899-12-31 12:00:00	1899-12-31 14:00:00	1899-12-31 16:00:00	1899-12-31 18:00:00	1899-12-31 20:00:00	1899-12-31 08:00:00	1899-12-31 10:00:00	1899-12-31 12:00:00	1899-12-31 14:00:00	1899-12-31 16:00:00	1899-12-31 18:00:00	1899-12-31 20:00:00	1899-12-31 08:00:00	1899-12-31 10:00:00	1899-12-31 12:00:00	1899-12-31 14:00:00	1899-12-31 16:00:00	1899-12-31 18:00:00	1899-12-31 20:00:00	1899-12-31 08:00:00	1899-12-31 10:00:00	1899-12-31 12:00:00	1899-12-31 14:00:00	1899-12-31 16:00:00	1899-12-31 18:00:00	1899-12-31 20:00:00	1899-12-31 08:00:00	1899-12-31 10:00:00	1899-12-31 12:00:00	1899-12-31 14:00:00	1899-12-31 16:00:00	1899-12-31 18:00:00	1899-12-31 20:00:00	average	average	average
CK	26.8	31.1	35.5	36.8	36.2	35.5	30.9	27.3	30.4	34	35	33.5	31	28	15.6	20.1	25.5	26.8	23.6	21.2	19.1	14.2	18.2	24	27.9	24.2	18.1	14.5	8.1	9.2	11.2	10.1	9.2	9	6.8	1	2	7.5	8	7	6.2	6	20.15	17.0286	18.5893
CK	26.3	30.5	34.5	36	35.5	34.8	29.9	27.5	30.1	33.2	35	33.8	30.8	27.2	14.8	19.5	24.1	26.1	23.1	20.8	18.5	15	17.8	22	27	23.1	17.6	14.8	7.9	9.2	10.8	9.5	7.2	6.7	6	0.7	1.9	8	9	7	6	6.2	19.6524	18.0286	18.8405
CK	26.8	30.8	34.8	35.8	34.5	34.2	29.2	27.7	30	33.1	35	33.2	30	27	15.1	20.5	26.1	27.5	23.2	20.8	18.9	14.2	18.1	24.9	27.9	24.9	17.8	14.2	8.2	9.6	11.2	10.1	9.5	9	8.1	1.1	2.5	9.5	9	7	6.8	6	20.0905	19.0286	19.5595
C1	28	32.3	37	38.5	37.5	36	31	27.5	31.8	36	38	35.7	32.2	29	14.9	20.1	26.5	27.8	23.2	21.8	19.1	14	17	25.5	25	25	18	14.8	6	9	10.5	9.5	8.8	7.2	6.3	0	2	7	8	6.5	5.5	5	20.3452	20.0286	20.1869
C1	27	30.5	34.9	36.3	36.2	35.6	30.6	27.9	30	33.2	35	33.5	30.9	28	13.8	20.1	24.6	26.9	23.9	21.4	19.2	14.9	17.8	24.2	27.2	24.2	18.2	16.9	8.2	9.5	11.2	10.1	10	8.7	8	1.1	3	9	8.5	7	6.5	5.8	20.2262	21.0286	20.6274
C1	27	31.2	36.2	36.2	35.8	35.5	30.9	28.3	31	34	35.2	33.8	31	28	16.9	21.8	26.2	27.5	24.5	22.1	20.1	15.2	18.8	25.9	27.2	24.5	18.8	15.5	9.5	11.2	12.5	11.8	11.2	10.1	8.3	3	4.5	10.3	10	7.5	7.1	7.5	21.0381	22.0286	21.5333
C2	27.1	30.5	34.8	36.8	35.9	35.1	30.5	27	30	33.9	35.9	34	31	28.9	15.5	20.5	25.8	27.1	23.9	21.5	19.7	14.2	16.8	29.2	25.8	24.5	18.5	15.3	7.5	10.1	11	10.8	10.4	9.2	7.8	1.8	3.2	9	9	8.9	4.5	6.5	20.4619	23.0286	21.7452
C2	26.4	30	34.2	36.7	35.8	35.2	30.4	25.4	28.3	32.9	35	34	31	27.7	13.5	18.5	24.1	26.1	22.8	20.6	18.3	11.5	15.9	24.5	25	23.9	16.9	13.2	7.5	7.5	9.2	8.2	7.9	7	6.7	-1.2	1	6.5	6.8	5.2	6	3.8	19.0452	24.0286	21.5369
C2	27.2	30	33.8	35.8	35.2	34.2	30.1	26.8	29.8	34	35.3	33.9	31	28	14.5	19.5	25.7	26.1	23.1	20.9	18.8	14	16.5	25.2	23.5	23.9	17.1	14.5	7.5	9	10.5	9.5	9	8	7.3	0.7	2.2	8.3	8.1	6.5	5.2	5.3	19.6548	25.0286	22.3417
C3	27	30.5	34.9	32.3	36.2	35.5	31	26.7	29.1	33.5	36	35	31.9	29	15.5	20.1	25.1	27.9	24.6	22.3	19.1	13.8	16.8	24.2	26	25.1	18.9	15.5	9.8	9.8	11.8	11	10.1	9.2	9	1	2.7	8.5	8.8	7.8	3.8	6	20.3048	26.0286	23.1667
C3	26.8	31.5	35.2	37.8	36.5	35.5	31.1	25.3	28	34	36	34.9	31	28.7	13.9	19.5	25.6	27.9	23.9	21	18.5	12.1	16.5	25	27	23.6	17.1	13.9	6.2	7.8	9.8	8.6	8	7.1	6.9	-1.5	0	7.5	7.3	5.5	4.8	4	19.519	27.0286	23.2738
C3	27.8	32	36.8	38.9	37.5	36.8	31.2	26.9	29.1	34.7	37.2	36	32.3	29	14.7	19.9	25.8	28.1	24.8	21.9	19.1	12.9	16	24.9	26.9	24.8	18.2	14.6	7.2	8.5	10.2	9.5	9	7.8	6.9	-1	0.3	7.5	8	6.2	5.2	5	20.2167	28.0286	24.1226
Soil temperature/℃	Treatments	Repeat 1	Repeat 2	Repeat 3	Mean	Standard deviation	0.05		SOC/g kg-1	Treatments	Repeat 1	Repeat 2	Repeat 3	Mean	Standard deviation	0.05	Note:AP-Available phosphorus, AK-Available potassium,NO3--N-Nitrate nitrogen,NH4+-N-Ammonium nitrogen,the same below.
	CK	18.5893	18.8405	19.5595	18.9964	0.503569	d			CK	2.15318	1.85091	2.04128	2.0151	0.0882	b
	C1	20.1869	20.6274	21.5333	20.7825	0.686493	c			C1	4.763	4.9607	2.98567	4.2365	0.628	a
	C2	21.7452	21.5369	22.3417	21.8746	0.417686	b			C2	4.30579	3.33244	3.04475	3.561	0.3815	a
	C3	23.1667	23.2738	24.1226	23.521	0.523737	a			C3	4.31481	4.53024	4.38039	4.4085	0.0638	a
Bulk density g/cm3	Treatments	Repeat 1	Repeat 2	Repeat 3	Mean	Standard deviation	0.05		TN/g kg-1	Treatments	Repeat 1	Repeat 2	Repeat 3	Mean	Standard deviation	0.05
	CK				1.75	0.391535	a			CK	1.22863	1.049	0.95907	1.0789	0.1372	c
	C1				1.57667	0.255408	a			C1	1.6586	1.5666	1.3653	1.5302	0.15	b
	C2				1.5	0.521153	a			C2	1.77778	1.87715	1.70181	1.7856	0.0879	b
	C3				1.26667	0.310215	a			C3	2.16811	2.0893	2.37306	2.2102	0.1465	a
	Treatments	Repeat 1	Repeat 2	Repeat 3	Mean	Standard deviation	0.05		AP/mg kg-1	Treatments	Repeat 1	Repeat 2	Repeat 3	Mean	Standard deviation	0.05
Water content/%	CK	1.69	1.38	1.73	1.6	0.1916	c			CK	15.6787	11.4947	10.7856	12.653	2.6442	b
	C1	3.18	3.02	4.25	3.4833	0.6688	b			C1	6.28515	9.54917	4.49492	6.7764	2.5627	b
	C2	4.97	5.15	4.39	4.8367	0.3972	ab			C2	32.2335	33.3975	23.6858	29.7722	5.3031	a
	C3	6.52	4.51	6.29	5.7733	1.1001	a			C3	19.5434	13.6102	7.3839	13.5125	6.0803	b
AK/mg kg-1	Treatments	Repeat 1	Repeat 2	Repeat 3	Mean	Standard deviation	0.05		NO3--N/mg kg-1	Treatments	Repeat 1	Repeat 2	Repeat 3	Mean	Standard deviation	0.05
	CK	43.951	49.9622	58.8022	50.9051	7.4704	a			CK	25.9205	18.3718	12.7582	19.0168	6.6048	c
	C1	82.6702	77.1894	34.5806	64.8134	13.3254	a			C1	46.0285	36.3914	24.59	35.67	10.7375	bc
	C2	119.445	57.211	47.1334	74.5963	19.1652	a			C2	58.4038	61.8027	45.4279	55.2115	8.6416	b
	C3	98.0518	134.826	71.7086	101.529	11.7021	a			C3	93.8054	98.3514	73.5825	88.5798	13.1854	a
									NH4+-N/mg kg-1	Treatments	Repeat 1	Repeat 2	Repeat 3	Mean	Standard deviation	0.05
										CK	2.84279	2.90916	2.68258	2.8115	0.1165	a
										C1	3.25168	2.94211	2.76792	2.9872	0.245	a
										C2	3.49281	3.52891	3.12779	3.3832	0.2219	a
										C3	5.71934	4.01689	3.30117	4.3458	1.2422	a
Treatments	SOC (g kg-1)	TN (g kg-1)	AP (mg kg-1)	AK (mg kg-1)	NO3--N (mg kg-1)	NH4+-N (mg kg-1)	ST (℃)	BD (g cm-3)	WC (%)
CK	2.02±0.09 b	1.08±0.14 c	12.65±2.64 b	50.91±7.47 a	19.02±6.60 c	2.81±0.12 a	19.00±0.50 d	1.75±0.39 a	1.60±0.19 c
C1	4.24±0.63 a	1.53±0.15 b	6.78±2.56 b	64.81±13.33 a	35.67±10.74 bc	2.99±0.25 a	20.78±0.69 c	1.58±0.26 a	3.48±0.67 b
C2	3.56±0.38 a	1.79±0.09 b	29.77±5.30 a	74.60±19.17 a	55.21±8.64 ab	3.38±0.22 a	21.87±0.42 b	1.50±0.52 a	4.84±0.40 ab
C3	4.41±0.06 a	2.21±0.15 a	13.51±6.08 b	101.53±11.70 a	88.58±13.19 a	4.35±1.24 a	23.52±0.52 a	1.27±0.31 a	5.77±1.10 a
CK: the volume ratio of soft rock to sand is 0:1; C1: the volume ratio of soft rock to sand is 1:5; C2: the volume ratio of soft rock to sand is 1:2; C3: the volume ratio of soft rock to sand is 1:1. SOC stands for soil organic carbon; TN stands for soil total nitrogen; AP stands for available phosphorus; AK stands for available potassium; NO3--N stands for nitrate nitrogen; NH4+-N stands for amm…
