# Supplementary material for: Response of organic carbon mineralization and bacterial communities to soft rock additions in sandy soils
Source: PeerJ. 2020 Apr 13;8:e8948. doi: 10.7717/peerj.8948 (PMC7161572; doi:10.7717/peerj.8948)
Supplement: Table S2 — CK: the volume ratio of soft rock to sand is 0:1; C1: the volume ratio of soft rock to sand is 1:5; C2: the volume ratio of soft rock to sand is 1:2; C3: the volume ratio of soft rock to sand is 1:1. Ct for amount of accumulation mineralizable SOC, C0 for amount of potential mineralizable SOC, k for constant of mineralization rate of SOC, T1∕2 for half turnover period, C0/SOC for ratio of potential mineralizable organic carbon to total organic carbon in soil. Mean ± Standard deviation, values followed by different letters in the same column mean significant difference at 0.05 level between treatments, ** indicates a extremely significant level of 1%. [file peerj-08-8948-s009.xlsx]

## Sheet: Sheet1
Ct (mg kg-1)	Treatments	Repeat 1	Repeat 2	Repeat 3	Mean	Standard deviation	0.05		T1/2 (d)	Treatments	Repeat 1	Repeat 2	Repeat 3	Mean	Standard deviation	0.05
	CK	306	400.66	399.07	368.577	54.1988	c			CK	6.02862	6.38226	9.27386	7.22825	1.8298	c
	C1	764.92	629.66	760.64	718.407	76.8867	b			C1	14.1793	22.2048	24.0261	20.1367	6.2155	a
	C2	633.24	648.04	618.31	633.197	14.865	b			C2	18.2432	22.8637	16.272	19.1263	5.3207	a
	C3	1014.67	1133.13	991.05	1046.28	76.133	a			C3	12.1592	17.0285	16.4596	15.2158	3.0227	b
C0 (mg kg-1)	Treatments	Repeat 1	Repeat 2	Repeat 3	Mean	Standard deviation	0.05		C0/SOC (%)	Treatments	Repeat 1	Repeat 2	Repeat 3	Mean	Standard deviation	0.05
	CK	416	378.43	399.07	397.833	18.8155	d			CK	18.3203	18.6756	19.55	18.8486	0.6328	b
	C1	784.92	829.66	768.72	794.433	31.5642	b			C1	17.4795	18.0347	20.747	18.7537	1.7484	b
	C2	713.24	668.04	660.58	680.62	28.4949	b			C2	16.0647	20.0466	21.2157	19.109	2.7005	b
	C3	1075.67	1154.76	1031.75	1087.39	62.3373	a			C3	24.9597	25.49	23.5539	24.6679	1.0005	a
k (d-1)	Treatments	Repeat 1	Repeat 2	Repeat 3	Mean	Standard deviation	0.05
	CK	0.1131	0.1022	0.0724	0.0959	0.0211	a
	C1	0.0469	0.0308	0.0256	0.0344	0.0111	b
	C2	0.0371	0.0268	0.0448	0.0362	0.009	b
	C3	0.0571	0.0401	0.0397	0.0456	0.0099	b
