# Supplementary material for: Response of organic carbon mineralization and bacterial communities to soft rock additions in sandy soils
Source: PeerJ. 2020 Apr 13;8:e8948. doi: 10.7717/peerj.8948 (PMC7161572; doi:10.7717/peerj.8948)
Supplement: Table S3 — CK: the volume ratio of soft rock to sand is 0:1; C1: the volume ratio of soft rock to sand is 1:5; C2: the volume ratio of soft rock to sand is 1:2; C3: the volume ratio of soft rock to sand is 1:1. Mean ± Standard deviation, values followed by different letters in the same column mean significant difference at 0.05 level between treatments. [file peerj-08-8948-s010.xlsx]

## Sheet: Sheet1
Actinobacteria	Treatments	Repeat1	Repeat2	Repeat3	Mean	standard deviation	0.05		Proteobacteria	Treatments	Repeat1	Repeat2	Repeat3	Mean	standard deviation	0.05
	CK	28.09	34.28	31.62	31.33	3.1052	a			CK	30.98	26.49	27.68	28.3833	2.3262	ab
	C1	38.23	35.19	32.96	35.46	2.6454	a			C1	26.94	25.74	25.26	25.98	0.8653	ab
	C2	31.93	30.94	29.32	30.73	1.3176	a			C2	28.02	36.12	30.05	31.3967	4.2146	a
	C3	23.62	20.59	23.35	22.52	1.6769	b			C3	21.4	22.23	23.35	22.3267	0.9786	b
Chloroflexi	Treatments	Repeat1	Repeat2	Repeat3	Mean	standard deviation	0.05		Acidobacteria	Treatments	Repeat1	Repeat2	Repeat3	Mean	standard deviation	0.05
	CK	11.1	12.62	11.8	11.84	0.7608	b			CK	3.68	3.42	4.84	3.98	0.756	c
	C1	18.19	11.83	19.51	16.51	4.1064	ab			C1	6.75	6.01	7.01	6.59	0.5188	b
	C2	13.27	10.8	12.44	12.17	1.2569	b			C2	7.88	7.36	7.41	7.55	0.2869	b
	C3	21.18	21.5	23.44	22.04	1.2229	a			C3	16.2	14.04	15.33	15.19	1.0868	a
Bacteroidetes	Treatments	Repeat1	Repeat2	Repeat3	Mean	standard deviation	0.05		Firmicutes	Treatments	Repeat1	Repeat2	Repeat3	Mean	standard deviation	0.05
	CK	6.01	6.86	6.42	6.43	0.4251	a			CK	4.51	3.63	4.01	4.05	0.4414	a
	C1	5.13	4.92	4.26	4.77	0.454	b			C1	4.55	5.78	4.46	4.93	0.7375	a
	C2	4.25	4.47	4.36	4.36	0.11	b			C2	4.23	4.19	4.54	4.32	0.1916	a
	C3	2.41	2.64	2.51	2.52	0.1153	c			C3	4.02	4.61	3.85	4.16	0.3989	a
Gemmatimonadetes	Treatments	Repeat1	Repeat2	Repeat3	Mean	standard deviation	0.05		Cyanobacteria	Treatments	Repeat1	Repeat2	Repeat3	Mean	standard deviation	0.05
	CK	2.23	2.58	3.23	2.68	0.5074	c			CK	6.02	6.22	5.91	6.05	0.1572	a
	C1	3.71	3.76	3.81	3.76	0.05	b			C1	0.72	0.58	0.74	0.68	0.0872	bc
	C2	4.72	4.02	4.28	4.34	0.3538	ab			C2	0.41	0.54	0.46	0.47	0.0656	c
	C3	4.35	5.28	4.83	4.82	0.4651	a			C3	0.89	0.68	0.74	0.77	0.1082	b
Saccharibacteria	Treatments	Repeat1	Repeat2	Repeat3	Mean	standard deviation	0.05		Verrucomicrobia	Treatments	Repeat1	Repeat2	Repeat3	Mean	standard deviation	0.05
	CK	1.78	2.05	1.81	1.88	0.148	ab			CK	1.31	1.2	1.24	1.25	0.0557	a
	C1	1.9	2.87	2.58	2.45	0.4979	a			C1	0.76	0.72	0.95	0.81	0.1229	b
	C2	1.27	1.24	1.57	1.36	0.1825	bc			C2	0.5	0.63	0.52	0.55	0.07	b
	C3	1.28	1.02	0.85	1.05	0.2166	c			C3	1.13	1.31	1.4	1.28	0.1375	a
Nitrospirae	Treatments	Repeat1	Repeat2	Repeat3	Mean	standard deviation	0.05		Planctomycetes	Treatments	Repeat1	Repeat2	Repeat3	Mean	standard deviation	0.05
	CK	0.26	0.24	0.31	0.27	0.0361	c			CK	0.77	0.6	0.79	0.72	0.1044	b
	C1	0.95	1.01	0.98	0.98	0.03	ab			C1	0.65	0.61	0.6	0.62	0.0265	b
	C2	1.19	1.08	1.42	1.23	0.1735	a			C2	0.61	0.45	0.56	0.54	0.0819	b
	C3	0.84	1.03	0.89	0.92	0.0985	b			C3	1.17	1.11	1.23	1.17	0.06	a
others	Treatments	Repeat1	Repeat2	Repeat3	Mean	standard deviation	0.05
	CK	1.23	0.86	1.33	1.14	0.2476	ab
	C1	0.74	0.86	0.83	0.81	0.0624	b
	C2	1.09	1	0.94	1.01	0.0755	ab
	C3	1.14	1.23	1.32	1.23	0.09	a
