# Supplementary material for: Response of organic carbon mineralization and bacterial communities to soft rock additions in sandy soils
Source: PeerJ. 2020 Apr 13;8:e8948. doi: 10.7717/peerj.8948 (PMC7161572; doi:10.7717/peerj.8948)
Supplement: Table S4 — CK: the volume ratio of soft rock to sand is 0:1; C1: the volume ratio of soft rock to sand is 1:5; C2: the volume ratio of soft rock to sand is 1:2; C3: the volume ratio of soft rock to sand is 1:1. Reads is the number of optimized sequences, OTU is the operational classification unit, Shannon is species diversity, Chao is species richness, Coverage is species coverage, and Shannoneven is species uniformity. Mean ± Standard deviation, values followed by different letters in the same column mean significant difference at 0.05 level between treatments. [file peerj-08-8948-s011.xlsx]

## Sheet: Sheet1
	Reads	Treatments	Repeat 1	Repeat 2	Repeat 3	Mean	Standard deviation	0.05		Chao	Treatments	Repeat 1	Repeat 2	Repeat 3	Mean	Standard deviation	0.05
		CK	50217	49220	51184	50207	442.358	a			CK	2251	2428	2875	2518	321.588	a
		C1	44496	47575	48320	46797	766.828	a			C1	2739	2421	2973	2711	277.063	a
		C2	41361	45970	42737	43356	1510.52	a			C2	2707	2852	2586	2715	133.18	a
		C3	46013	41207	48173	45131	1772.06	a			C3	2646	2647	2687	2660	23.388	a
	OTUs	Treatments	Repeat 1	Repeat 2	Repeat 3	Mean	Standard deviation	0.05		Coverage (%)	Treatments	Repeat 1	Repeat 2	Repeat 3	Mean	Standard deviation	0.05
		CK	1978	2064	2177	2073	99.8048	a			CK	98.96	97.91	98.6	98.49	0.5336	a
		C1	2241	2156	2101	2166	70.5337	a			C1	98.25	97.94	98.32	98.17	0.2022	a
		C2	2166	1932	2523	2207	297.626	a			C2	98.17	98.01	98.03	98.07	0.0872	a
		C3	2291	2054	2402	2249	177.761	a			C3	98.03	99.31	98.16	98.5	0.7045	a
	Shannon	Treatments	Repeat 1	Repeat 2	Repeat 3	Mean	Standard deviation	0.05		Shannoneven	Treatments	Repeat 1	Repeat 2	Repeat 3	Mean	Standard deviation	0.05
		CK	5.12	7.54	5.07	5.91	1.4118	a			CK	0.7835	0.7645	0.7755	0.7745	0.0095	a
		C1	6.07	6.78	5.21	6.02	0.7862	a			C1	0.7111	0.867	0.7724	0.7835	0.0785	a
		C2	6.78	6.26	6.34	6.46	0.28	a			C2	0.8376	0.8534	0.8266	0.8392	0.0135	a
		C3	6.03	7.01	5.83	6.29	0.6315	a			C3	0.8164	0.8282	0.8022	0.8156	0.013	a
	Treatments	Reads	OTUs	Shannon	Chao	Coverage (%)	Shannoneven
	CK	50207±442 a	2073±100 a	5.91±1.41 a	2518±322 a	98.49±0.53 a	0.7745±0.01 a
	C1	46797±767 a	2166±71 a	6.02±0.79 a	2711±277 a	98.17±0.20 a	0.7835±0.08 a
	C2	43356±1511 a	2207±297 a	6.46±0.28 a	2715±133 a	98.07±0.09 a	0.8392±0.01 a
	C3	45131±1772 a	2249±178 a	6.29±0.63 a	2660±23 a	98.50±0.70 a	0.8156±0.01 a
