# Supplementary material for: Response of organic carbon mineralization and bacterial communities to soft rock additions in sandy soils
Source: PeerJ. 2020 Apr 13;8:e8948. doi: 10.7717/peerj.8948 (PMC7161572; doi:10.7717/peerj.8948)
Supplement: Table S5 — SOC for amount of soil organic carbon, Ct for amount of accumulation mineralizable of SOC, C0 for amount of potential mineralizable of SOC, Cr for amount of cumulative mineralization rate of SOC, k for constant of mineralization rate of SOC, T1∕2 for half turnover period, C0/SOC for ratio of potential mineralizable organic carbon to total organic carbon in soil. Shannon is species diversity, Chao is species richness, Coverage is species coverage, and Shannoneven is species uniformity. ** and * mean significant correlation at the 0.01 and 0.05 levels, respectively. [file peerj-08-8948-s012.xlsx]

## Sheet: Sheet1
		SOC	Ct	C0	Cr	k	T1/2	C0/SOC	Shannon	Chao	Coverage	Shannoneven
		2.02	0.37	0.4	18.29	0.0959	7.23	18.85	5.91	2518	0.9849	0.7745
		4.23	0.72	0.79	16.96	0.0344	20.14	18.75	6.02	2711	0.9817	0.7835
		3.56	0.63	0.68	17.78	0.0362	19.13	19.11	6.46	2715	0.9807	0.8392
		4.41	1.05	1.09	23.73	0.0456	15.22	24.67	6.29	2660	0.985	0.8156
	R2
		SOC	Ct	C0	Cr	k	T1/2	C0/SOC	Shannon	Chao	Coverage	Shannoneven
	SOC	1
	Ct	0.8005	1
	C0	0.8442	0.9966	1
	Cr	0.1399	0.5608	0.5035	1
	k	0.8047	0.4259	0.4744	0.0007	1
	T1/2	0.6663	0.2496	0.2954	0.0295	0.9604	1
	C0/SOC	0.2721	0.7187	0.6657	0.9729	0.0331	0.0002	1
	Shannon	0.2417	0.2449	0.2417	0.0927	0.4192	0.3144	0.1319	1
	Chao	0.7076	0.318	0.3633	0.0056	0.9869	0.9844	0.0062	0.4258	1
	Coverage	0.0851	0.0128	0.0045	0.4416	0.4564	0.6244	0.3156	0.1918	0.5701	1
	Shannoneven	0.183	0.1887	0.1846	0.0751	0.363	0.2717	0.1047	0.9947	0.3764	0.1949	1
