# Supplementary material for: Response of organic carbon mineralization and bacterial communities to soft rock additions in sandy soils
Source: PeerJ. 2020 Apr 13;8:e8948. doi: 10.7717/peerj.8948 (PMC7161572; doi:10.7717/peerj.8948)
Supplement: Table S6 — SOC stands for soil organic carbon; TN stands for soil total nitrogen; AP stands for available phosphorus; AK stands for available potassium; NO\documentclass[12pt]{minimal} \usepackage{amsmath} \usepackage{wasysym} \usepackage{amsfonts} \usepackage{amssymb} \usepackage{amsbsy} \usepackage{upgreek} \usepackage{mathrsfs} \setlength{\oddsidemargin}{-69pt} \begin{document} }{}${}_{3}^{-}$\end{document}3−-N stands for nitrate nitrogen; NH\documentclass[12pt]{minimal} \usepackage{amsmath} \usepackage{wasysym} \usepackage{amsfonts} \usepackage{amssymb} \usepackage{amsbsy} \usepackage{upgreek} \usepackage{mathrsfs} \setlength{\oddsidemargin}{-69pt} \begin{document} }{}${}_{4}^{+}$\end{document}4+-N stands for ammonium nitrogen; ST stands for soil temperature; BD stands for soil bulk density; WC stands for mass water content of soil. ** and * mean significant correlation at the 0.01 and 0.05 levels, respectively. [file peerj-08-8948-s013.xls]

## Sheet: Sheet1
Treatment	SOC	TN	AP	AK	Nitrate	Ammonium	ST	BD	WC	Actinobacteria	Proteobacteria	Chloroflexi	Acidobacteria	Bacteroidetes	Firmicutes	Gemmatimonadetes	Cyanobacteria	Saccharibacteria	Verrucomicrobia	Nitrospirae	Planctomycetes
CK	2.02	1.08	12.65	50.91	19.02	2.81	19	1.75	1.6	31.33	28.38	11.84	3.98	6.43	4.05	2.68	6.05	1.88	1.25	0.27	0.72
C1	4.24	1.53	6.78	64.81	35.67	2.99	20.78	1.58	3.48	35.46	25.98	12.14	6.59	4.77	4.95	3.76	0.68	2.45	0.81	0.98	0.62
C2	3.56	1.79	29.77	74.6	55.21	3.38	21.87	1.5	4.84	30.73	31.4	12.17	7.55	4.36	4.32	4.34	0.47	1.36	0.55	1.2	0.54
C3	4.41	2.21	13.51	101.53	88.58	4.35	23.52	1.27	5.77	22.52	22.33	22.04	15.19	2.52	4.16	4.82	0.77	1.05	1.28	0.92	1.17
r	SOC	TN	AP	AK	Nitrate	Ammonium	ST	BD	WC	Actinobacteria	Proteobacteria	Chloroflexi	Acidobacteria	Bacteroidetes	Firmicutes	Gemmatimonadetes	Cyanobacteria	Saccharibacteria	Verrucomicrobia	Nitrospirae	Planctomycetes
SOC	1	0.8227	-0.1003	0.7546	0.7247	0.64	0.8184	-0.8073	0.819	-0.2652	-0.542	0.5453	0.7211	-0.8525	0.5394	0.8523	-0.9248	-0.1594	-0.2389	0.7964	0.3425
TN	0.8227	1	0.2537	0.9804	0.9826	0.9369	0.9999	-0.9926	0.9872	-0.7147	-0.4891	0.8024	0.9384	-0.9913	-0.0207	0.9847	-0.7938	-0.6923	-0.0509	0.7095	0.5963
AP	-0.1003	0.2537	1	0.1588	0.2388	0.1521	0.2637	-0.1645	0.3713	-0.1629	0.6791	-0.1362	0.0196	-0.1248	-0.3733	0.3355	-0.2424	-0.5834	-0.574	0.4545	-0.315
AK	0.7546	0.9804	0.1588	1	0.9966	0.9855	0.9797	-0.9956	0.9389	-0.8239	-0.603	0.9031	0.9864	-0.9859	-0.1454	0.9312	-0.6689	-0.7413	0.1451	0.5572	0.7408
Nitrate	0.7247	0.9826	0.2388	0.9966	1	0.9843	0.9828	-0.9914	0.9502	-0.832	-0.5391	0.8816	0.973	-0.9775	-0.1874	0.9389	-0.6671	-0.7842	0.1068	0.5746	0.7101
Ammonium	0.64	0.9369	0.1521	0.9855	0.9843	1	0.9366	-0.9654	0.8802	-0.9077	-0.622	0.946	0.9876	-0.9439	-0.2983	0.8641	-0.5348	-0.8094	0.2785	0.4215	0.8184
ST	0.8184	0.9999	0.2637	0.9797	0.9828	0.9366	1	-0.9918	0.9882	-0.7158	-0.4809	0.7996	0.9365	-0.9899	-0.0263	0.9853	-0.7931	-0.6977	-0.0555	0.7112	0.5924
BD	-0.8073	-0.9926	-0.1645	-0.9956	-0.9914	-0.9654	-0.9918	1	-0.9605	0.7678	0.5821	-0.8673	-0.9731	0.9967	0.0611	-0.9573	0.7349	0.6966	-0.0677	-0.6263	-0.6874
WC	0.819	0.9872	0.3713	0.9389	0.9502	0.8802	0.9882	-0.9605	1	-0.6335	-0.3524	0.7002	0.8721	-0.9612	0.0241	0.9981	-0.8493	-0.6778	-0.2037	0.8	0.4645
Actinobacteria	-0.2652	-0.7147	-0.1629	-0.8239	-0.832	-0.9077	-0.7158	0.7678	-0.6335	1	0.5521	-0.9175	-0.8578	0.7183	0.6539	-0.5973	0.1423	0.8962	-0.543	-0.0506	-0.8842
Proteobacteria	-0.542	-0.4891	0.6791	-0.603	-0.5391	-0.622	-0.4809	0.5821	-0.3524	0.5521	1	-0.8129	-0.7163	0.5964	-0.0589	-0.368	0.1909	0.1449	-0.6739	0.061	-0.8633
Chloroflexi	0.5453	0.8024	-0.1362	0.9031	0.8816	0.946	0.7996	-0.8673	0.7002	-0.9175	-0.8129	1	0.9585	-0.8465	-0.3291	0.6867	-0.3292	-0.69	0.5552	0.1583	0.9575
Acidobacteria	0.7211	0.9384	0.0196	0.9864	0.973	0.9876	0.9365	-0.9731	0.8721	-0.8578	-0.7163	0.9585	1	-0.9626	-0.1753	0.8648	-0.5766	-0.7076	0.2959	0.4329	0.8363
Bacteroidetes	-0.8525	-0.9913	-0.1248	-0.9859	-0.9775	-0.9439	-0.9899	0.9967	-0.9612	0.7183	0.5964	-0.8465	-0.9626	1	-0.0197	-0.963	0.775	0.6372	-0.034	-0.6594	-0.6609
Firmicutes	0.5394	-0.0207	-0.3733	-0.1454	-0.1874	-0.2983	-0.0263	0.0611	0.0241	0.6539	-0.0589	-0.3291	-0.1753	-0.0197	1	0.0845	-0.5284	0.7162	-0.5298	0.4738	-0.4225
Gemmatimonadetes	0.8523	0.9847	0.3355	0.9312	0.9389	0.8641	0.9853	-0.9573	0.9981	-0.5973	-0.368	0.6867	0.8648	-0.963	0.0845	1	-0.8763	-0.6313	-0.2234	0.8205	0.4482
Cyanobacteria	-0.9248	-0.7938	-0.2424	-0.6689	-0.6671	-0.5348	-0.7931	0.7349	-0.8493	0.1423	0.1909	-0.3292	-0.5766	0.775	-0.5284	-0.8763	1	0.2121	0.5583	-0.9666	-0.0633
Saccharibacteria	-0.1594	-0.6923	-0.5834	-0.7413	-0.7842	-0.8094	-0.6977	0.6966	-0.6778	0.8962	0.1449	-0.69	-0.7076	0.6372	0.7162	-0.6313	0.2121	1	-0.1963	-0.233	-0.5856
Verrucomicrobia	-0.2389	-0.0509	-0.574	0.1451	0.1068	0.2785	-0.0555	-0.0677	-0.2037	-0.543	-0.6739	0.5552	0.2959	-0.034	-0.5298	-0.2234	0.5583	-0.1963	1	-0.7252	0.7712
Nitrospirae	0.7964	0.7095	0.4545	0.5572	0.5746	0.4215	0.7112	-0.6263	0.8	-0.0506	0.061	0.1583	0.4329	-0.6594	0.4738	0.8205	-0.9666	-0.233	-0.7252	1	-0.1279
Planctomycetes	0.3425	0.5963	-0.315	0.7408	0.7101	0.8184	0.5924	-0.6874	0.4645	-0.8842	-0.8633	0.9575	0.8363	-0.6609	-0.4225	0.4482	-0.0633	-0.5856	0.7712	-0.1279	1
P	SOC	TN	AP	AK	Nitrate	Ammonium	ST	BD	WC	Actinobacteria	Proteobacteria	Chloroflexi	Acidobacteria	Bacteroidetes	Firmicutes	Gemmatimonadetes	Cyanobacteria	Saccharibacteria	Verrucomicrobia	Nitrospirae	Planctomycetes
SOC		0.1773	0.8997	0.2454	0.2753	0.36	0.1816	0.1927	0.181	0.7348	0.458	0.4547	0.2789	0.1475	0.4606	0.1477	0.0752	0.8406	0.7611	0.2036	0.6575
TN	0.1773		0.7463	0.0196	0.0174	0.0631	0.0001	0.0074	0.0128	0.2853	0.5109	0.1976	0.0616	0.0087	0.9793	0.0153	0.2062	0.3077	0.9491	0.2905	0.4037
AP	0.8997	0.7463		0.8412	0.7612	0.8479	0.7363	0.8355	0.6287	0.8371	0.3209	0.8638	0.9804	0.8752	0.6267	0.6645	0.7576	0.4166	0.426	0.5455	0.685
AK	0.2454	0.0196	0.8412		0.0034	0.0145	0.0203	0.0044	0.0611	0.1761	0.397	0.0969	0.0136	0.0141	0.8546	0.0688	0.3311	0.2587	0.8549	0.4428	0.2592
Nitrate	0.2753	0.0174	0.7612	0.0034		0.0157	0.0172	0.0086	0.0498	0.168	0.4609	0.1184	0.027	0.0225	0.8126	0.0611	0.3329	0.2158	0.8932	0.4254	0.2899
Ammonium	0.36	0.0631	0.8479	0.0145	0.0157		0.0634	0.0346	0.1198	0.0923	0.378	0.054	0.0124	0.0561	0.7017	0.1359	0.4652	0.1906	0.7215	0.5785	0.1816
ST	0.1816	0.0001	0.7363	0.0203	0.0172	0.0634		0.0082	0.0118	0.2842	0.5191	0.2004	0.0635	0.0101	0.9737	0.0147	0.2069	0.3023	0.9445	0.2888	0.4076
BD	0.1927	0.0074	0.8355	0.0044	0.0086	0.0346	0.0082		0.0395	0.2322	0.4179	0.1327	0.0269	0.0033	0.9389	0.0427	0.2651	0.3034	0.9323	0.3737	0.3126
WC	0.181	0.0128	0.6287	0.0611	0.0498	0.1198	0.0118	0.0395		0.3665	0.6476	0.2998	0.1279	0.0388	0.9759	0.0019	0.1507	0.3222	0.7963	0.2	0.5355
Actinobacteria	0.7348	0.2853	0.8371	0.1761	0.168	0.0923	0.2842	0.2322	0.3665		0.4479	0.0825	0.1422	0.2817	0.3461	0.4027	0.8577	0.1038	0.457	0.9494	0.1158
Proteobacteria	0.458	0.5109	0.3209	0.397	0.4609	0.378	0.5191	0.4179	0.6476	0.4479		0.1871	0.2837	0.4036	0.9411	0.632	0.8091	0.8551	0.3261	0.939	0.1367
Chloroflexi	0.4547	0.1976	0.8638	0.0969	0.1184	0.054	0.2004	0.1327	0.2998	0.0825	0.1871		0.0415	0.1535	0.6709	0.3133	0.6708	0.31	0.4448	0.8417	0.0425
Acidobacteria	0.2789	0.0616	0.9804	0.0136	0.027	0.0124	0.0635	0.0269	0.1279	0.1422	0.2837	0.0415		0.0374	0.8247	0.1352	0.4234	0.2924	0.7041	0.5671	0.1637
Bacteroidetes	0.1475	0.0087	0.8752	0.0141	0.0225	0.0561	0.0101	0.0033	0.0388	0.2817	0.4036	0.1535	0.0374		0.9803	0.037	0.225	0.3628	0.966	0.3406	0.3391
Firmicutes	0.4606	0.9793	0.6267	0.8546	0.8126	0.7017	0.9737	0.9389	0.9759	0.3461	0.9411	0.6709	0.8247	0.9803		0.9155	0.4716	0.2838	0.4702	0.5262	0.5775
Gemmatimonadetes	0.1477	0.0153	0.6645	0.0688	0.0611	0.1359	0.0147	0.0427	0.0019	0.4027	0.632	0.3133	0.1352	0.037	0.9155		0.1237	0.3687	0.7766	0.1795	0.5518
Cyanobacteria	0.0752	0.2062	0.7576	0.3311	0.3329	0.4652	0.2069	0.2651	0.1507	0.8577	0.8091	0.6708	0.4234	0.225	0.4716	0.1237		0.7879	0.4417	0.0334	0.9367
Saccharibacteria	0.8406	0.3077	0.4166	0.2587	0.2158	0.1906	0.3023	0.3034	0.3222	0.1038	0.8551	0.31	0.2924	0.3628	0.2838	0.3687	0.7879		0.8037	0.767	0.4144
Verrucomicrobia	0.7611	0.9491	0.426	0.8549	0.8932	0.7215	0.9445	0.9323	0.7963	0.457	0.3261	0.4448	0.7041	0.966	0.4702	0.7766	0.4417	0.8037		0.2748	0.2288
Nitrospirae	0.2036	0.2905	0.5455	0.4428	0.4254	0.5785	0.2888	0.3737	0.2	0.9494	0.939	0.8417	0.5671	0.3406	0.5262	0.1795	0.0334	0.767	0.2748		0.8721
Planctomycetes	0.6575	0.4037	0.685	0.2592	0.2899	0.1816	0.4076	0.3126	0.5355	0.1158	0.1367	0.0425	0.1637	0.3391	0.5775	0.5518	0.9367	0.4144	0.2288	0.8721
